# Supplementary material
Source: PubMed Central journal article supplement (PMC8336969)
Supplement: mmc1.pdf [file mmc1.pdf]

# THE LANCET

## Infectious Diseases

### Supplementary appendix

This appendix formed part of the original submission. We post it as supplied by the authors.

Supplement to: Chu CY, Marais G, Opperman C, et al. Performance of saliva and mid-turbinate swabs for detection of the beta variant in South Africa. *Lancet Infect Dis* 2021; published online August 4. [http://dx.doi.org/10.1016/S1473-3099\(21\)00405-9](http://dx.doi.org/10.1016/S1473-3099(21)00405-9)

## Appendix 2

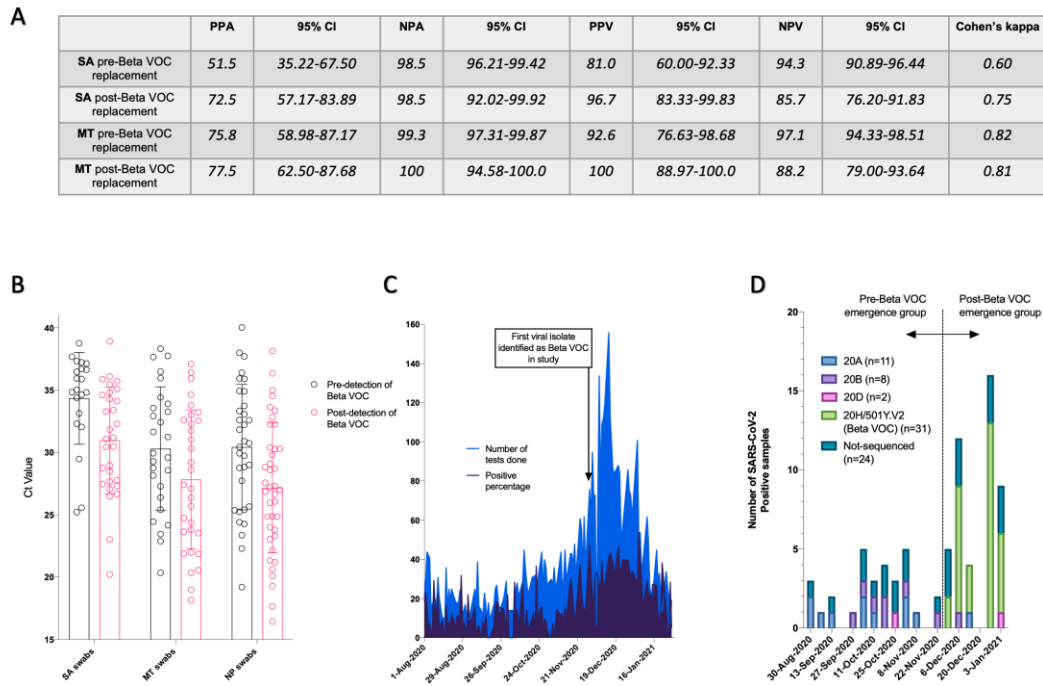

**Figure 1.**

### A: Diagnostic validity.

SA: Saliva; MT: Mid-turbinate; NP: Nasopharyngeal PPA: Positive percent agreement; NPA: Negative percent agreement; PPV: Positive predictive value; NPV: Negative predictive value; 95% CI: 95% Confidence interval; Cohen Kappa: The following nomenclature were used to describe the relative strength of agreement associated with kappa statistics: 0 = poor; 0–0.2 = slight; 0.21–0.4 = fair; 0.41–0.6 = moderate; 0.61–0.8 = substantial; and 0.81– 1 = almost perfect.

Positive and negative percent agreement (PPA, NPA) to NP swab as well as PPV and NPV of SA and MT self-administered swabs as a diagnostic sample for SARS-CoV-2 PCR prior to (n=33/300) and after (n=40/107) replacement with the Beta VOC. Post-emergence, 3 proven non-Beta infected participants were excluded from analysis.

Confidence intervals were calculated using the Wilson-Brown method. The likelihood ratio of having a positive SA swab result pre- and post-emergence of the Beta VOC for participants with a positive NP swab result was 34 and 48 respectively.

**B: Mean cycle threshold (Ct) values.**

Ct values for SA, MT and NP swabs are shown with 1 standard deviation error bars. Pre-Beta VOC replacement, the mean SA ( $p < 0.001$ ) but not the mean MT Ct values were significantly different from mean NP values as assessed by paired t-test. Similarly, post-Beta VOC replacement, the mean Ct values for saliva ( $p < 0.0001$ ) and MT swabs ( $p < 0.01$ ) were significantly different from mean NP values.

Pre-and post-Beta replacement the Ct values for SA, MT and NP was 34.35 (SD  $\pm$  3.69) and 30.96 (SD  $\pm$  4.28); 30.31 (SD  $\pm$  4.96) and 27.84 (SD  $\pm$  5.57) and 30.44 (SD  $\pm$  5.04) and 27.16 (SD  $\pm$  5.21), respectively. Comparing the periods, mean Ct SA swab values decreased by 3.39 ( $p < 0.01$ ) and a comparable 2.47 (NS) and 3.28 ( $p < 0.01$ ) for MT and NP swabs, respectively, suggesting a higher viral burden (assessed by unpaired t-test. p: P-value, NS: Not significant)

**C: Longitudinal Pre-test probability.** For all samples collected at the Groote Schuur Hospital SARS-CoV-2 testing site, the pre-test probability pre- and post-Beta VOC replacement was 11% ( $n=2148$ ) and 32% ( $n=2669$ ), respectively.

**D: Whole Genome Sequencing.** The longitudinal number of isolates sequenced ( $n=52$ ) and Nextstrain Clades are displayed. Post- Beta VOC emergence, clades 20A, 20B and 20D were excluded from diagnostic validity assessment. The proportion of

positive samples with Ct values  $\geq 30$  (n=24), not deemed suitable for WGS, are also shown.
